# Supplementary material
Source: HighWire-hosted journal article supplement (https://www.rcpjournals.org/highwire/filestream/12490/field_highwire_adjunct_files/0/Dasgupta_supplementary_material_S1.pdf)

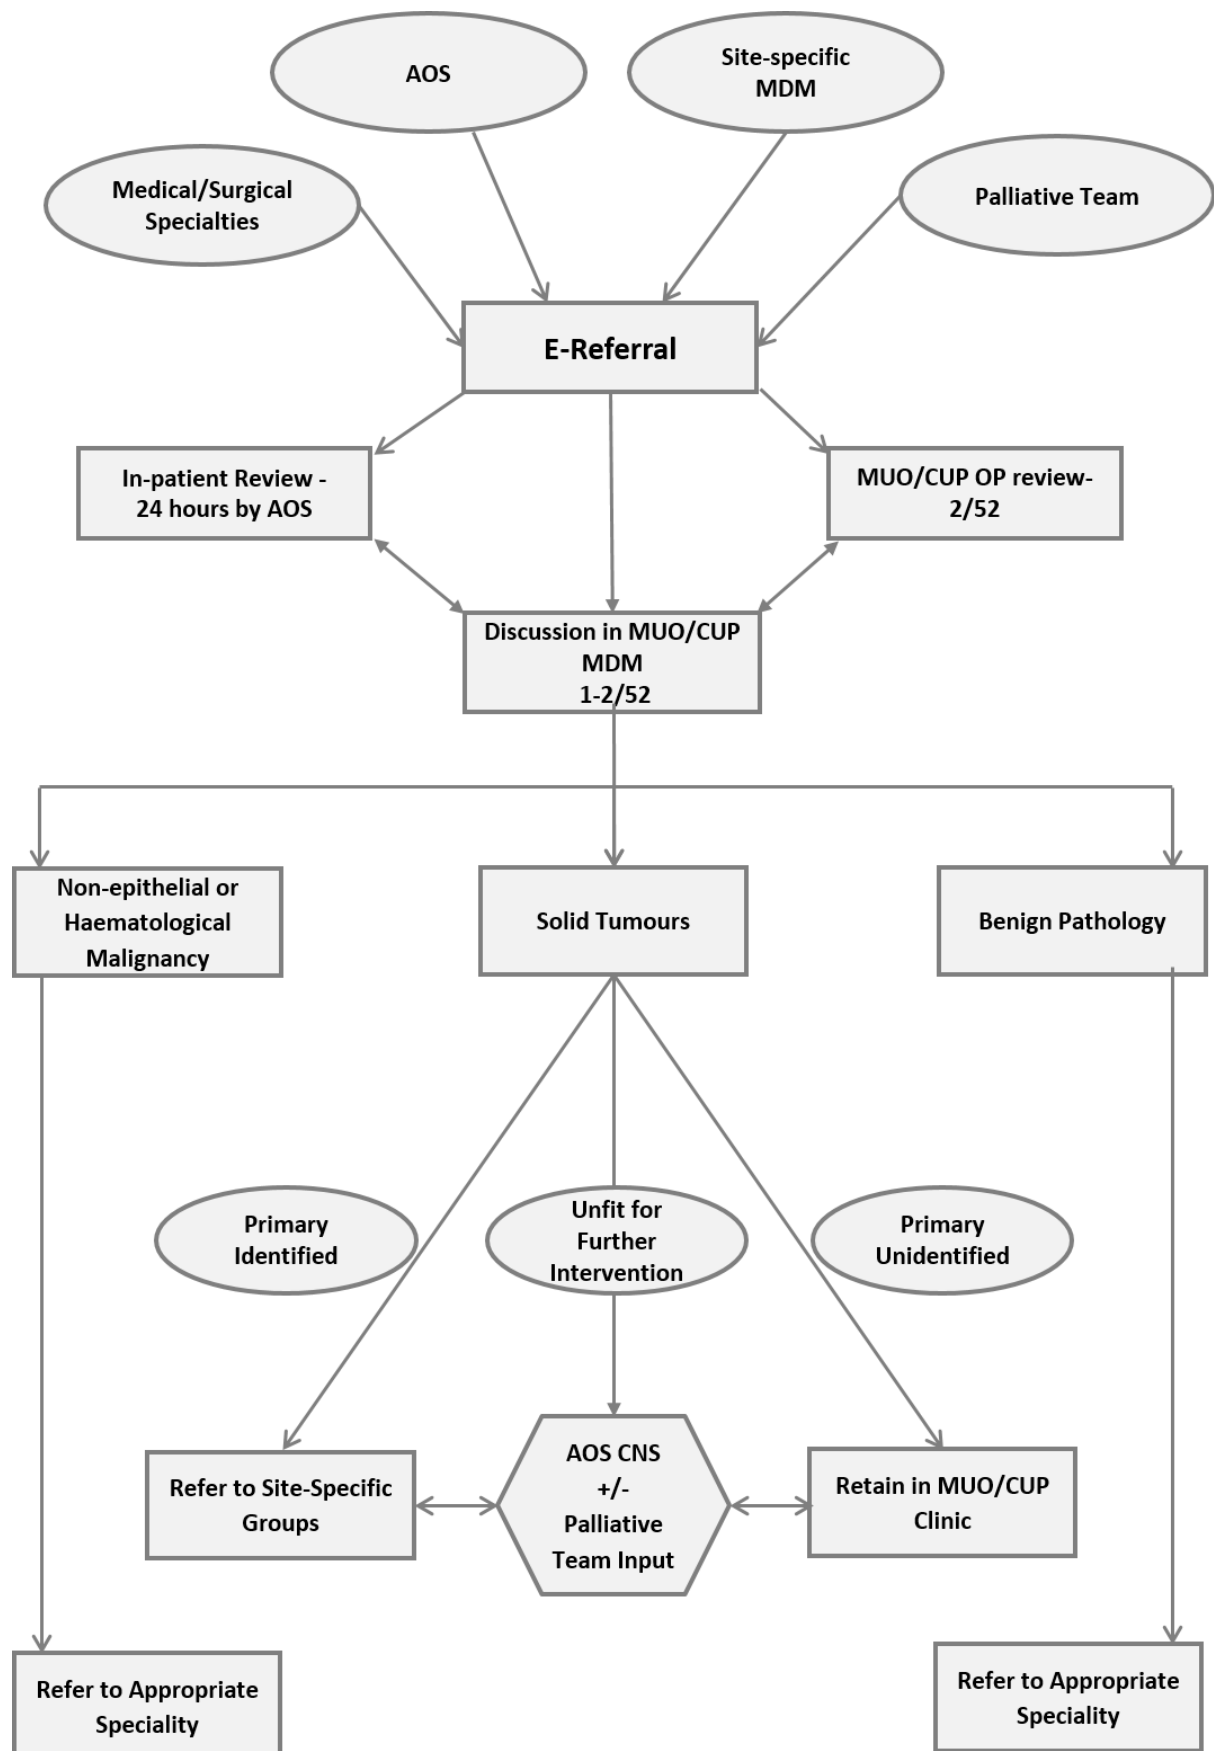

Supplement: Dasgupta_supplementary_material_S1.pdf [file Dasgupta_supplementary_material_S1.pdf]
